# Supplementary material
Source: ML conference proceedings conference paper supplement (https://proceedings.neurips.cc/paper_files/paper/2022/hash/2aab664e0d1656e8b56c74f868e1ea69-Abstract.html)
Supplement: Supplementary file 1 [file 2aab664e0d1656e8b56c74f868e1ea69-Supplemental-Conference.zip]

Archive with 73 entries (47 files):
- Adversarial_Robustness_is_at_Odds_with_Lazy_Training/
- __MACOSX/._Adversarial_Robustness_is_at_Odds_with_Lazy_Training
- Adversarial_Robustness_is_at_Odds_with_Lazy_Training/.DS_Store
- __MACOSX/Adversarial_Robustness_is_at_Odds_with_Lazy_Training/._.DS_Store
- Adversarial_Robustness_is_at_Odds_with_Lazy_Training/README.md
- __MACOSX/Adversarial_Robustness_is_at_Odds_with_Lazy_Training/._README.md
- Adversarial_Robustness_is_at_Odds_with_Lazy_Training/ntk_normal.py
- __MACOSX/Adversarial_Robustness_is_at_Odds_with_Lazy_Training/._ntk_normal.py
- Adversarial_Robustness_is_at_Odds_with_Lazy_Training/Neurips22_AdvAtkNTK_supp.pdf
- __MACOSX/Adversarial_Robustness_is_at_Odds_with_Lazy_Training/._Neurips22_AdvAtkNTK_supp.pdf
- Adversarial_Robustness_is_at_Odds_with_Lazy_Training/advtrain.py
- __MACOSX/Adversarial_Robustness_is_at_Odds_with_Lazy_Training/._advtrain.py
- Adversarial_Robustness_is_at_Odds_with_Lazy_Training/.git/
- Adversarial_Robustness_is_at_Odds_with_Lazy_Training/advtraingap.py
- __MACOSX/Adversarial_Robustness_is_at_Odds_with_Lazy_Training/._advtraingap.py
- Adversarial_Robustness_is_at_Odds_with_Lazy_Training/.git/config
- Adversarial_Robustness_is_at_Odds_with_Lazy_Training/.git/objects/
- Adversarial_Robustness_is_at_Odds_with_Lazy_Training/.git/HEAD
- Adversarial_Robustness_is_at_Odds_with_Lazy_Training/.git/info/
- Adversarial_Robustness_is_at_Odds_with_Lazy_Training/.git/logs/
- Adversarial_Robustness_is_at_Odds_with_Lazy_Training/.git/description
- Adversarial_Robustness_is_at_Odds_with_Lazy_Training/.git/hooks/
- Adversarial_Robustness_is_at_Odds_with_Lazy_Training/.git/refs/
- Adversarial_Robustness_is_at_Odds_with_Lazy_Training/.git/index
- Adversarial_Robustness_is_at_Odds_with_Lazy_Training/.git/COMMIT_EDITMSG
- Adversarial_Robustness_is_at_Odds_with_Lazy_Training/.git/FETCH_HEAD
- Adversarial_Robustness_is_at_Odds_with_Lazy_Training/.git/objects/33/
- Adversarial_Robustness_is_at_Odds_with_Lazy_Training/.git/objects/bb/
- Adversarial_Robustness_is_at_Odds_with_Lazy_Training/.git/objects/fe/
- Adversarial_Robustness_is_at_Odds_with_Lazy_Training/.git/objects/ec/
- Adversarial_Robustness_is_at_Odds_with_Lazy_Training/.git/objects/pack/
- Adversarial_Robustness_is_at_Odds_with_Lazy_Training/.git/objects/10/
- Adversarial_Robustness_is_at_Odds_with_Lazy_Training/.git/objects/info/
- Adversarial_Robustness_is_at_Odds_with_Lazy_Training/.git/objects/06/
- Adversarial_Robustness_is_at_Odds_with_Lazy_Training/.git/objects/64/
- Adversarial_Robustness_is_at_Odds_with_Lazy_Training/.git/objects/f0/
- Adversarial_Robustness_is_at_Odds_with_Lazy_Training/.git/objects/4f/
- Adversarial_Robustness_is_at_Odds_with_Lazy_Training/.git/info/exclude
- Adversarial_Robustness_is_at_Odds_with_Lazy_Training/.git/logs/HEAD
- Adversarial_Robustness_is_at_Odds_with_Lazy_Training/.git/logs/refs/
- Adversarial_Robustness_is_at_Odds_with_Lazy_Training/.git/hooks/commit-msg.sample
- Adversarial_Robustness_is_at_Odds_with_Lazy_Training/.git/hooks/pre-rebase.sample
- Adversarial_Robustness_is_at_Odds_with_Lazy_Training/.git/hooks/pre-commit.sample
- Adversarial_Robustness_is_at_Odds_with_Lazy_Training/.git/hooks/applypatch-msg.sample
- Adversarial_Robustness_is_at_Odds_with_Lazy_Training/.git/hooks/fsmonitor-watchman.sample
- Adversarial_Robustness_is_at_Odds_with_Lazy_Training/.git/hooks/pre-receive.sample
- Adversarial_Robustness_is_at_Odds_with_Lazy_Training/.git/hooks/prepare-commit-msg.sample
- Adversarial_Robustness_is_at_Odds_with_Lazy_Training/.git/hooks/post-update.sample
- Adversarial_Robustness_is_at_Odds_with_Lazy_Training/.git/hooks/pre-merge-commit.sample
- Adversarial_Robustness_is_at_Odds_with_Lazy_Training/.git/hooks/pre-applypatch.sample
- Adversarial_Robustness_is_at_Odds_with_Lazy_Training/.git/hooks/pre-push.sample
- Adversarial_Robustness_is_at_Odds_with_Lazy_Training/.git/hooks/update.sample
- Adversarial_Robustness_is_at_Odds_with_Lazy_Training/.git/hooks/push-to-checkout.sample
- Adversarial_Robustness_is_at_Odds_with_Lazy_Training/.git/refs/heads/
- Adversarial_Robustness_is_at_Odds_with_Lazy_Training/.git/refs/tags/
- Adversarial_Robustness_is_at_Odds_with_Lazy_Training/.git/refs/remotes/
- Adversarial_Robustness_is_at_Odds_with_Lazy_Training/.git/objects/33/5846b7d1af50e04f480b86a88d2a7c768bf7a1
- Adversarial_Robustness_is_at_Odds_with_Lazy_Training/.git/objects/bb/880a83b788697ea32db96e7145ba904bfdbf55
- Adversarial_Robustness_is_at_Odds_with_Lazy_Training/.git/objects/fe/ecfb19129b0c6d8638bb5bcec1aab82617fc14
- Adversarial_Robustness_is_at_Odds_with_Lazy_Training/.git/objects/ec/e0149a0755d1ddf542b74fcf02fa1755bf6fa4
- Adversarial_Robustness_is_at_Odds_with_Lazy_Training/.git/objects/10/0603efc4a093af9b5937f4355664ed000c6d52
- Adversarial_Robustness_is_at_Odds_with_Lazy_Training/.git/objects/06/168c3f2f00f670c8e6c6c94b35a095aef7a411
- Adversarial_Robustness_is_at_Odds_with_Lazy_Training/.git/objects/64/8b8350457a445d67042e0896df6ee47576c91d
- Adversarial_Robustness_is_at_Odds_with_Lazy_Training/.git/objects/f0/f41391f943daa580d7f63660c915007dabe589
- Adversarial_Robustness_is_at_Odds_with_Lazy_Training/.git/objects/4f/04ed7e5b240ec5f88f4964c52295d552ac194f
- Adversarial_Robustness_is_at_Odds_with_Lazy_Training/.git/logs/refs/heads/
- Adversarial_Robustness_is_at_Odds_with_Lazy_Training/.git/logs/refs/remotes/
- Adversarial_Robustness_is_at_Odds_with_Lazy_Training/.git/refs/heads/master
- Adversarial_Robustness_is_at_Odds_with_Lazy_Training/.git/refs/remotes/origin/
- Adversarial_Robustness_is_at_Odds_with_Lazy_Training/.git/logs/refs/heads/master
- Adversarial_Robustness_is_at_Odds_with_Lazy_Training/.git/logs/refs/remotes/origin/
- Adversarial_Robustness_is_at_Odds_with_Lazy_Training/.git/refs/remotes/origin/master
- Adversarial_Robustness_is_at_Odds_with_Lazy_Training/.git/logs/refs/remotes/origin/master
