# Supplementary material
Source: ML conference proceedings conference paper supplement (https://proceedings.neurips.cc/paper_files/paper/2022/hash/2aab664e0d1656e8b56c74f868e1ea69-Abstract.html)
Supplement: Supplementary file 1 [file 2aab664e0d1656e8b56c74f868e1ea69-Supplemental-Conference.zip › Adversarial_Robustness_is_at_Odds_with_Lazy_Training/ntk_normal.py]

'''
Standard Gradient Descent
'''

import numpy as np
import torch, torchvision
from torchvision import datasets, transforms
import torch.optim as optim
import torch.nn as nn
import torch.nn.functional as F
from torch.utils.data import Dataset, DataLoader
import math
from typing import *
from PIL import Image
import random
import copy
import pickle
import argparse
import sys
from torch.autograd import Variable, Function
from sklearn.model_selection import StratifiedKFold, train_test_split, ShuffleSplit

from art.estimators.classification import KerasClassifier, PyTorchClassifier
from art.defences.trainer import AdversarialTrainerMadryPGD,AdversarialTrainer
from art.data_generators import PyTorchDataGenerator
from art.utils import load_dataset, check_and_transform_label_format

import datetime, time
date_time = datetime.datetime.utcnow().isoformat().replace(":", "")
torch.backends.cudnn.benchmark=True

parser = argparse.ArgumentParser(description='Adv-Atk-NTK')
parser.add_argument('--T', default=1000, type=int, help='epoch')
parser.add_argument('--width', default=1000, type=int, help='width of network')
parser.add_argument('--lr', default=0.1, type=float, help='step size')
parser.add_argument('--bs', default=64, type=int, help='batch size')
parser.add_argument('--num1', default=0, type=int, help='mnist number1')
parser.add_argument('--num2', default=1, type=int, help='mnist number2')
parser.add_argument('--size', default=28, type=int, help='size of image')
parser.add_argument('--C0', default=10, type=int, help='C0')
parser.add_argument('--seed', default=0, type=int, help='seed')
args = parser.parse_args()

seed = args.seed
np.random.seed(seed)
random.seed(seed)
torch.manual_seed(seed)
torch.cuda.manual_seed(seed)
torch.cuda.manual_seed_all(seed)


device = 'cuda' if torch.cuda.is_available() else 'cpu'
(x_train, y_train_onehot), (x_test, y_test_onehot), min_, max_ = load_dataset(str("mnist"))
x_train = np.float32(np.reshape(x_train, (-1, 784)))
x_test = np.float32(np.reshape(x_test, (-1, 784)))
y_train_onehot = np.float32(y_train_onehot)
y_test_onehot = np.float32(y_test_onehot)
y_train = np.argmax(y_train_onehot, axis=1)
y_test = np.argmax(y_test_onehot, axis=1)

class net(nn.Module):
    def __init__(self, d=784, width=10000):
        super(net, self).__init__()
        self.fc1 = nn.Linear(d, width, bias = True)
        self.fc2 = nn.Linear(width, 1, bias = True)
        # set the top layer weight to be -1 or +1.
        self.fc1.weight.data.normal_(0.0, 1)
        self.fc1.bias.data.normal_(0.0, 1)
        self.fc2.weight.data = 1/math.sqrt(width)*torch.tensor(np.sign(np.random.normal(size = (1, width))).astype("float32"))
        self.fc2.bias.data = 1/math.sqrt(width)*torch.tensor(np.sign(np.random.normal(size = (1, 1))).astype("float32"))
    def forward(self, x):
        batch_size = x.size(0)
        x = x.view(batch_size, -1)
        x = F.relu(self.fc1(x))
        x = self.fc2(x)
        return x
        
        
class Logistic_Loss(torch.nn.Module):
    def __init__(self):
        super(Logistic_Loss, self).__init__()

    def forward(self, inputs, target):
        L = torch.log(1 + torch.exp(-target*inputs.t()))
        return torch.mean(L)


num1 = args.num1
num2 = args.num2

X = np.concatenate((x_train[y_train==num1],x_train[y_train==num2]))
y = np.concatenate((np.array([-1]*len(x_train[y_train==num1])),np.array([1]*len(x_train[y_train==num2]))))

n = len(y)
idx = np.arange(n)
np.random.shuffle(idx)
X_train = X[idx]
Y_train = y[idx]
X_train_tensor = torch.from_numpy(X_train).float().to(device)
Y_train_tensor = torch.from_numpy(Y_train).long().to(device)

X_test = np.concatenate((x_test[y_test==num1], x_test[y_test==num2]))
Y_test = np.concatenate((np.array([-1]*len(x_test[y_test==num1])),np.array([1]*len(x_test[y_test==num2]))))

X_test_tensor = Variable(torch.from_numpy(X_test).float(), requires_grad= True).to(device)
Y_test_tensor = torch.from_numpy(Y_test).long().to(device)


width = args.width
lr = args.lr
T = args.T
bs = args.bs
size = args.size
C0=args.C0

name = 'mnist_ntk'+str(num1)+'vs'+str(num2)+'_size'+str(size)+'_T'+str(T)+'_bs'+str(bs)+'_lr'+str(lr)+'_width'+str(width)+'C0_'+str(C0)+'_'+str(args.seed)
log_filename = 'log_normal/'+name+'.txt'
log = open(log_filename, 'w')
sys.stdout = log


Transform = transforms.Resize((size, size))
X_train_tensor = Transform(X_train_tensor.reshape(len(X_train_tensor),1,28,28)).reshape(-1, size*size)
X_test_tensor = Transform(X_test_tensor.reshape(len(X_test_tensor),1,28,28)).reshape(-1, size*size)

# decide whether to normalize the data or not
#X_train_tensor /= torch.norm(X_train_tensor, dim=1)[:,None]
#X_test_tensor /= torch.norm(X_test_tensor, dim=1)[:,None]


model = net(d=size*size, width=width).to(device)
model1 =  copy.deepcopy(model)

# whether fix the top layer or not
for param in model.fc2.parameters():
    param.requires_grad = False
    
optimizer = optim.SGD(model.parameters(), lr = lr)
#optimizer = optim.SGD(model.parameters(), lr = lr, weight_decay=5e-4, momentum=0.9)
criterion = Logistic_Loss()

trainloss = []
testacc = []
diffweight = []
for t in range(T):
    l=[]
    for i in range((n - 1) // bs + 1):
        begin = i * bs
        end = begin + bs

        optimizer.zero_grad()
        pred = model(X_train_tensor[begin:end])
        loss = criterion(pred, Y_train_tensor[begin:end])
        loss.backward()
        optimizer.step()
        l.append(loss.item())
    
    accuracy = np.sum(((model(X_test_tensor).sign()).squeeze(-1)==Y_test_tensor).detach().cpu().numpy()) / len(Y_test_tensor)
    trained_weight = torch.cat((model.fc1.weight, model.fc1.bias[:,None]),dim=1)
    random_weight = torch.cat((model1.fc1.weight, model1.fc1.bias[:,None]),dim=1)
    weight_diff = np.linalg.norm((trained_weight - random_weight).detach().cpu().numpy(),axis=1).max()
    
    trainloss.append(np.mean(l))
    testacc.append(accuracy)
    diffweight.append(weight_diff)
    
    print('t:', t, 'loss:', trainloss[-1],'acc:', accuracy, 'weight diff:', weight_diff)
    if weight_diff > C0/math.sqrt(width):
        break
    
    
    
torch.save({
            'epoch':t,
            'model_state_dict':model.state_dict(),
            'model_rand_state_dict':model1.state_dict(),
            'trainloss':trainloss,
            'testacc':testacc,
            'diffweight':diffweight,
           },'checkpoint/'+name+'_'+str(date_time)+'.pth')
           
# start searching the smallest pertubation that can change the sign of the prediction using linesearch
step = 0.001
delta = []
gnorm = []
eta = []
for i in range(len(X_test)):
    input = X_test_tensor[i:i+1]
    grad = torch.autograd.grad(model.forward(input), input)[0]
    grad_norm = np.linalg.norm(grad.detach().cpu().numpy())
    gnorm.append(grad_norm)
    direction = grad/grad_norm
    advsample = input
    sgn = -torch.sign(model.forward(input))
    count = 0
    while count < 5000 and torch.sign(model.forward(advsample)) == torch.sign(model.forward(input)) and torch.sign(model.forward(input))==Y_test_tensor[i:i+1]:
        advsample = advsample + sgn * direction * step
        count += 1
    delta.append(count*step)
    eta.append(delta[-1]/grad_norm)
    print('gradient norm:', grad_norm, 'stepsize:',delta[-1], 'eta:', eta[-1])

print('gradient norm:', gnorm)
print('stepsize:',delta)
print('eta:', eta)

print('grad_mean:', np.mean(gnorm), 'grad_std:', np.std(gnorm))
print('delta_mean:', np.mean(delta), 'delta_std:', np.std(delta))
print('eta_mean:', np.mean(eta), 'eta_std:', np.std(eta))

f = open('log_normal/'+name+'.pkl', 'wb')
pickle.dump((gnorm, delta, eta),f)
f.close()
